# Supplementary material for: Computed Tomography Radiomics Signatures: Sensitive biomarkers for clinical decision support in pancreatic cancer- a pilot study
Source: bioRxiv or medRxiv preprint supplement (doi:10.1101/2021.12.03.21267217), 2021-12-05
Supplement: Supplementary file [file media-1.pdf]

## Computed Tomography Radiomics Signatures: Sensitive biomarkers for clinical decision support in pancreatic cancer- a pilot study

Abbas Habibalahi<sup>1,2</sup>, Daniel Moses<sup>2,3</sup>, Jared Campbell<sup>1,2</sup>, Saabah Mahbub<sup>1,2</sup>, Andrew P Barbour<sup>4,5</sup>, Jaswinder S Samra<sup>6</sup>, Koroush S Haghighi<sup>7</sup>, Val J GebSKI<sup>8</sup>, David Goldstein<sup>7,9</sup>, Ewa Goldys<sup>1,2</sup>

<sup>1</sup>ARC Centre of Excellence Centre for Nanoscale Biophotonics, University of New South Wales, Sydney, 2052, NSW, Australia

<sup>2</sup>The Graduate School of Biomedical Engineering, University of New South Wales, Sydney, 2052, NSW, Australia

<sup>3</sup>Department of Medical Imaging, Randwick Campus Hospitals, Sydney, 2052, NSW, Australia

<sup>4</sup>The University of Queensland Diamantina Institute, The University of Queensland, Brisbane, 4102, Queensland, Australia

<sup>5</sup>Queensland Melanoma Project, Princess Alexandra Hospital, Brisbane, 4102, Queensland, Australia

<sup>6</sup>The University of Sydney, Northern Clinical School, Sydney, 2006, NSW, Australia

<sup>7</sup>Prince of Wales Hospital, Prince of Wales Clinical School, University of New South Wales, 2052, NSW, Australia.

<sup>8</sup>NHMRC Clinical Trials Centre, University of Sydney, Sydney, 2006, NSW, Australia

<sup>9</sup>Department of Medical Oncology, Prince of Wales Hospital, Sydney, 2052, NSW, Australia

### Supplementary materials

**Supplementary table 1. Patient characterization**

| PID     | Inclusion/Exclusion | Reason for exclusion | age  | cea | ca19 | bmi  |
|---------|---------------------|----------------------|------|-----|------|------|
| GAP0001 | Excluded            | PET Scan             | 64.7 | 4.2 | 5    | 28.8 |
| GAP0002 | Excluded            | PET Scan             | 62.0 | 2.7 | 66   | 30.3 |
| GAP0003 | Included            | NA                   | 63.4 | 4   | 70   | 24.4 |
| GAP0004 | Included            | NA                   | 66.6 | 5.5 | 5    | 23.4 |
| GAP0005 | Excluded            | PET Scan             | 60.3 | 2.6 | 30   | 23.7 |
| GAP0006 | Included            | NA                   | 64.5 | 2.1 | 13   | 34.0 |
| GAP0007 | Included            | NA                   | 63.2 | 5.8 | 44   | 36.7 |
| GAP0008 | Excluded            | Arterial phase only  | 78.1 | 26  | 5441 | 21.1 |
| GAP0009 | Included            | NA                   | 70.1 | 3   | 740  | 37.1 |
| GAP0010 | Included            | NA                   | 49.1 | 2   | 221  | 30.4 |
| GAP0011 | Excluded            | PET Scan             | 59.9 | 1.6 | 1    | 29.9 |
| GAP0012 | Included            | NA                   | 68.1 | 2   | 19   | 28.9 |
| GAP0013 | Included            | NA                   | 53.6 | 25  | 296  | 26.2 |
| GAP0014 | Excluded            | Technical problem    | 65.9 | 6.2 | 360  | 29.0 |
| GAP0015 | Included            | NA                   | 47.7 | 31  | 81   | 25.4 |
| GAP0016 | Included            | NA                   | 54.3 | 5   | 1    | 25.2 |
| GAP0017 | Included            | NA                   | 47.8 | 32  | 4359 | 28.7 |

|         |          |                   |      |     |      |      |
|---------|----------|-------------------|------|-----|------|------|
| GAP0018 | Included | NA                | 71.0 | 2.7 | 1109 | 23.5 |
| GAP0019 | Included | NA                | 66.8 | 2.5 | 3300 | 21.6 |
| GAP0020 | Included | NA                | 66.3 | 0.7 | 133  | 26.6 |
| GAP0021 | Included | NA                | 50.2 | 1   | 21   | 20.4 |
| GAP0022 | Excluded | PET Scan          | 67.0 | 6.1 | 128  | 34.4 |
| GAP0023 | Included | NA                | 77.6 | 5.3 | 440  | 25.4 |
| GAP0024 | Included | NA                | 71.1 | 0.5 | 58   | 24.2 |
| GAP0025 | Included | NA                | 58.3 | 3   | 2    | 19.0 |
| GAP0026 | Excluded | Empty folder      | 69.7 | 1   | 37   | 25.4 |
| GAP0027 | Excluded | MRI Scan          | 66.7 | 1.3 | 86   | 47.4 |
| GAP0028 | Excluded | Technical problem | 76.4 | 0.6 | 7    | 18.5 |
| GAP0029 | Included | NA                | 68.3 | 3   | 470  | 21.3 |
| GAP0030 | Included | NA                | 76.1 | 2   | 7305 | 26.4 |
| GAP0031 | Included | NA                | 59.3 | 3   | 16   | 37.1 |
| GAP0032 | Included | NA                | 62.4 | 1   | 80   | 34.1 |
| GAP0033 | Included | NA                | 78.6 | 5.2 | 65   | 21.6 |
| GAP0034 | Included | NA                | 66.8 | 1.3 | 562  | 27.0 |
| GAP0035 | Included | NA                | 42.8 |     | 47   | 19.5 |
| GAP0036 | Included | Technical problem | 67.6 | 6.5 | 1200 | 26.0 |
| GAP0037 | Excluded | PET Scan          | 60.7 | 4.8 | 954  | 27.4 |
| GAP0038 | Excluded | PET Scan          | 69.1 | 2.3 | 47   | 25.7 |
| GAP0039 | Included | NA                | 75.7 | 5   | 21   | 25.0 |
| GAP0040 | Excluded | PET Scan          | 63.7 | 1.3 | 1279 | 30.4 |
| GAP0041 | Excluded | PET Scan          | 60.3 | 1.4 | 116  | 27.0 |
| GAP0042 | Included | NA                | 58.0 | 1   | 274  | 20.7 |

**Supplementary figure 1. Consort flow diagram**

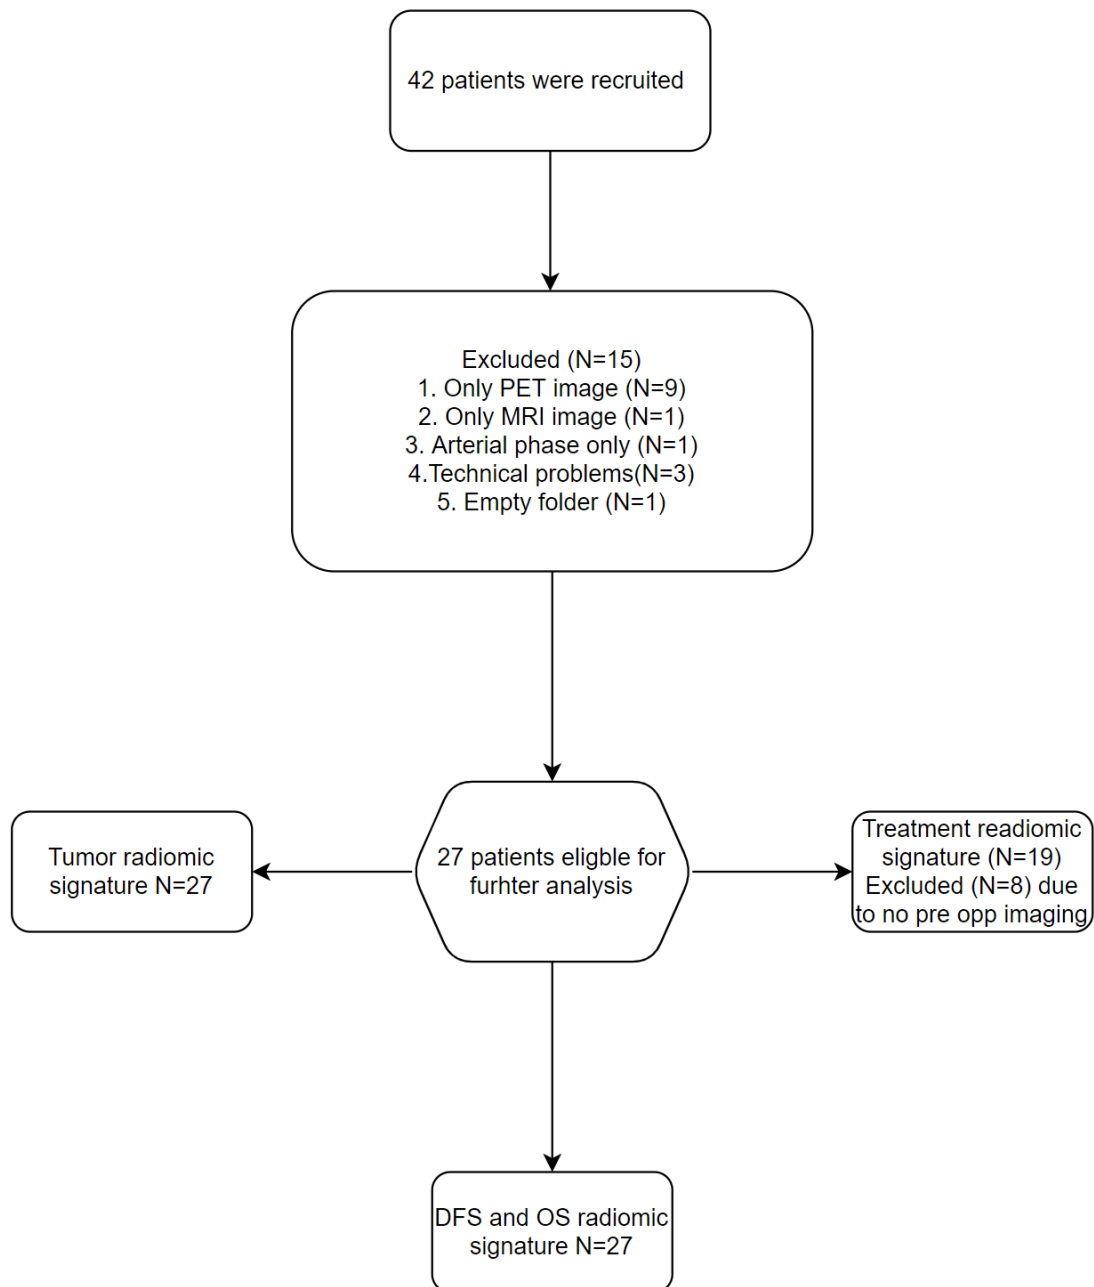

Supplementary figure 1. Consort flow diagram representing the number of patients used in each radiomic signature.

Supplementary Table 2. Tumor radiomic signature

| Feature No | Feature name                      | Coefficient (PC1) |
|------------|-----------------------------------|-------------------|
| 1          | DependenceNonUniformityNormalized | -0.21             |
| 2          | DependenceVariance                | 0.19              |
| 3          | LargeDependenceEmphasis           | 0.19              |

|    |                                      |       |
|----|--------------------------------------|-------|
| 4  | DependenceEntropy                    | 0.22  |
| 5  | SmallDependenceEmphasis              | -0.15 |
| 6  | ZonePercentage                       | -0.14 |
| 7  | GrayLevelNonUniformity               | 0.21  |
| 8  | SmallDependenceLowGrayLevelEmphasis  | -0.20 |
| 9  | GrayLevelNonUniformity               | 0.20  |
| 10 | ZoneVariance                         | 0.19  |
| 11 | LargeAreaLowGrayLevelEmphasis        | 0.15  |
| 12 | LargeAreaEmphasis                    | 0.19  |
| 13 | ZoneEntropy                          | 0.19  |
| 14 | LargeDependenceHighGrayLevelEmphasis | 0.19  |
| 15 | Idmn                                 | 0.17  |
| 16 | Busyness                             | 0.13  |
| 17 | Coarseness                           | -0.15 |
| 18 | RunLengthNonUniformity               | 0.18  |
| 19 | Idn                                  | 0.14  |
| 20 | DependenceNonUniformity              | 0.18  |
| 21 | ShortRunLowGrayLevelEmphasis         | -0.18 |
| 22 | TotalEnergy                          | 0.13  |
| 23 | LowGrayLevelRunEmphasis              | -0.16 |
| 24 | LowGrayLevelEmphasis                 | -0.16 |
| 25 | GrayLevelNonUniformity               | 0.16  |
| 26 | LargeAreaHighGrayLevelEmphasis       | 0.17  |
| 27 | Median                               | -0.11 |
| 28 | Minimum                              | -0.17 |
| 29 | 90Percentile                         | -0.09 |
| 30 | LowGrayLevelZoneEmphasis             | -0.15 |
| 31 | Mean                                 | -0.11 |
| 32 | Contrast                             | -0.09 |
| 33 | GrayLevelNonUniformityNormalized     | -0.15 |
| 34 | SmallAreaLowGrayLevelEmphasis        | -0.14 |

**Supplementary Table 3. Treatment radiomic signature**

| Feature no | Feature name                          | Coefficient (PC1) |
|------------|---------------------------------------|-------------------|
| 1          | DependenceNonUniformityNormalized"    | -0.21             |
| 2          | "DependenceEntropy"                   | 0.22              |
| 3          | "Flatness"                            | 0.20              |
| 4          | "DependenceVariance"                  | 0.17              |
| 5          | "Coarseness"                          | -0.20             |
| 6          | "LeastAxisLength"                     | 0.21              |
| 7          | "Maximum2DDiameterColumn"             | 0.20              |
| 8          | "LargeDependenceEmphasis"             | 0.16              |
| 9          | "SmallDependenceLowGrayLevelEmphasis" | -0.20             |
| 10         | "ZoneEntropy"                         | 0.20              |
| 11         | "RunLengthNonUniformityNormalized"    | 0.16              |

|    |                                        |       |
|----|----------------------------------------|-------|
| 12 | "SurfaceVolumeRatio"                   | -0.19 |
| 13 | "Maximum2DDiameterRow"                 | 0.18  |
| 14 | "Idmn"                                 | 0.16  |
| 15 | "Maximum3DDiameter"                    | 0.18  |
| 16 | "ShortRunEmphasis"                     | 0.16  |
| 17 | "RunPercentage"                        | 0.16  |
| 18 | "Idn"                                  | 0.12  |
| 19 | "SmallDependenceEmphasis"              | -0.10 |
| 20 | "GrayLevelNonUniformityNormalized"     | -0.17 |
| 21 | "LargeDependenceHighGrayLevelEmphasis" | 0.18  |
| 22 | "LowGrayLevelRunEmphasis"              | -0.19 |
| 23 | "ZonePercentage"                       | -0.10 |
| 24 | "MinorAxisLength"                      | 0.20  |
| 25 | "LowGrayLevelEmphasis"                 | -0.18 |
| 26 | "SurfaceArea"                          | 0.19  |
| 27 | "MajorAxisLength"                      | 0.14  |
| 28 | "LowGrayLevelZoneEmphasis"             | -0.18 |
| 29 | "SmallAreaLowGrayLevelEmphasis"        | -0.17 |
| 30 | "ShortRunLowGrayLevelEmphasis"         | -0.18 |

**Supplementary Table 4. DFS radiomic signature**

| Feature No | Feature name                          | Coefficient |
|------------|---------------------------------------|-------------|
| 1          | ZoneEntropy                           | -1.19       |
| 2          | "GrayLevelNonUniformityNormalized"    | -0.82       |
| 3          | "LeastAxisLength"                     | -0.85       |
| 4          | "Maximum2DDiameterRow"                | 1.14        |
| 5          | "SmallDependenceLowGrayLevelEmphasis" | -0.21       |

**Supplementary Table 5. OS radiomic signature**

| Feature No | Feature name       | Coefficient |
|------------|--------------------|-------------|
| 1          | ZoneEntropy        | -0.99       |
| 2          | ClusterTendency    | -9.05       |
| 3          | Correlation        | 1.21        |
| 4          | DifferenceVariance | 8.40        |
| 5          | RootMeanSquared    | 0.50        |

**Supplementary figure 2: DFS and OS classification**

**Description:** The DFS and OS radiomic signatures were fed to a linear classifier to predict patient group labels. The ROC corresponding to DFS and OS was cross validated with AUC found to be  $0.94\pm 0.07$  and  $0.87\pm 0.17$ , respectively.

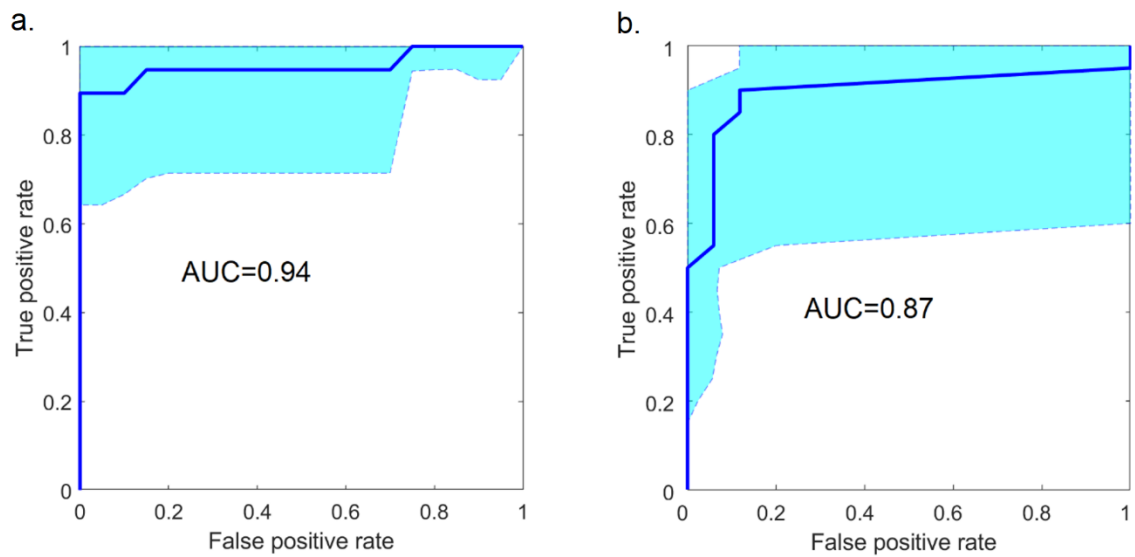

*Supplementary figure2. (a) ROC corresponding to DFS to classify long vs. short survival time with  $AUC=0.94\pm 0.07$ . 95% confidence interval shaded in blue (b) ROC corresponding to OS to classify long vs. short survival time with  $AUC=0.87\pm 0.17$ . 95% confidence interval shaded in blue.*
